# Supplementary material for: Planar confined water organisation in lipid bilayer stacks of phosphatidylcholine and phosphatidylethanolamine
Source: Royal Society of Chemistry journal article supplement (doi:10.1039/d3sm00387f), 2023-01-01
Supplement: d3sm00387f1.pdf [file d3sm00387f1.pdf]

ESI updated: 13 June 2023

## Electronic supporting information (ESI)

# Planar Confined Water Organisation in Lipid Bilayer Stacks of Phosphatidylcholine and Phosphatidylethanolamine

Gerome Vancuylenberg, Amin Sadeghpour, Arwen Tyler and Michael Rappolt\*

School of Food Science and Nutrition, Woodhouse Lane, University of Leeds, Leeds LS2 9JT,  
UK

### Content

- Figure S1: Common bilayer electron density profile (EDP) models.
- Figure S2: Examples of global fitting of SAXS data of DMPC, egg-PC and DOPC.
- Table S1: Lattice spacings and form factor values of DMPE.
- Table S2: Structural parameters of DMPC, egg-PC and DOPC (30 °C) and DMPE (60 °C).
- Derivation of the parameter  $D_{H2}$ .
- Figure S3: Refined membrane hydration.

\*Corresponding author's e-mail: [m.rappolt@leeds.ac.uk](mailto:m.rappolt@leeds.ac.uk)

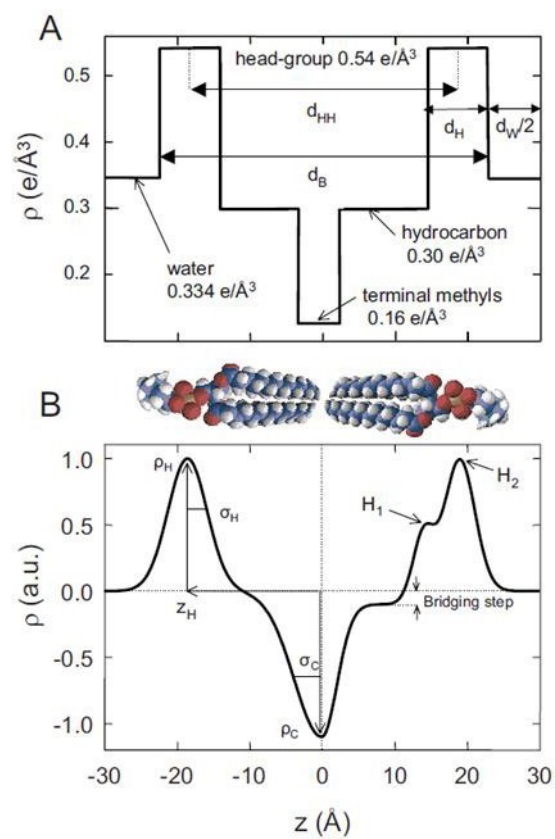

**Fig. S1** Common bilayer electron density profile (EDP) models. (A) A strip model and (B) two different Gaussian component models. The figure has been taken with permission from reference <sup>1</sup>.

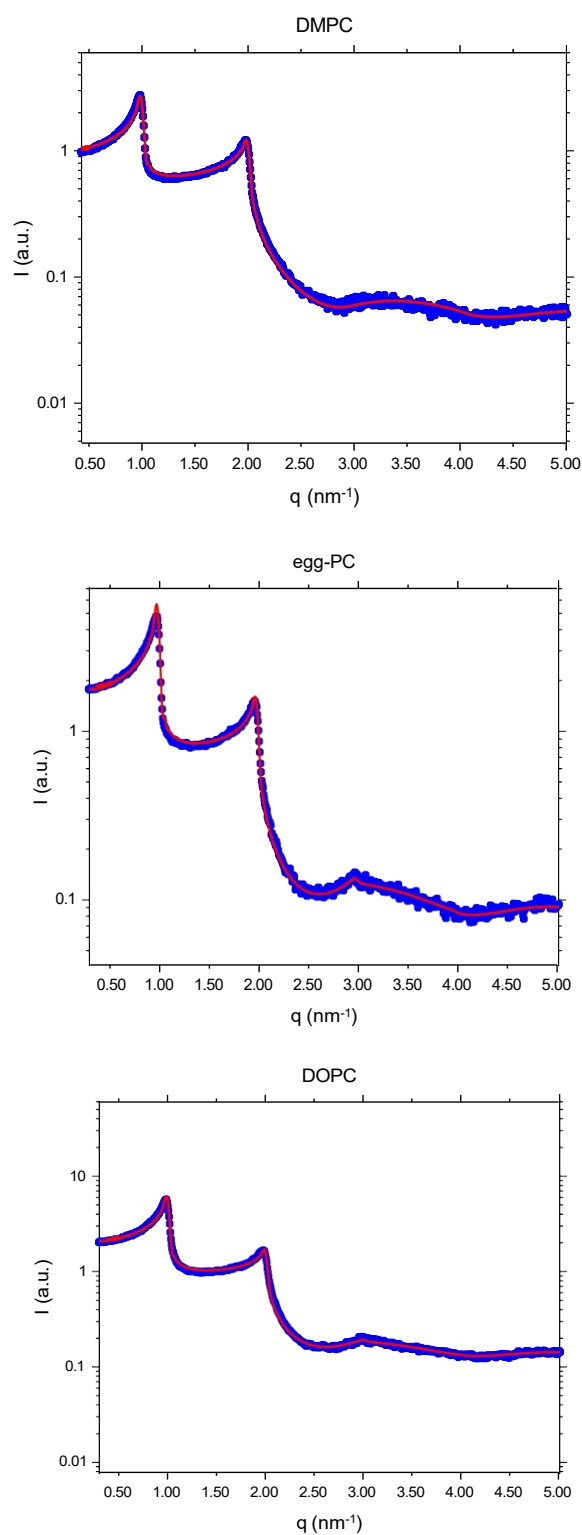

**Fig. S2** Global fitting of SAXS data of DMPC, egg-PC and DOPC at 30 °C (shown from top to bottom). Solid red lines give best fits.

**Table S1:** Lattice spacing and form factor values of DMPE.

| Temperature (°C) | d-spacing (nm) | Fourier Coefficients F(h)/F(1) |           |           |           |
|------------------|----------------|--------------------------------|-----------|-----------|-----------|
|                  |                | F(1)/F(1)                      | F(2)/F(1) | F(3)/F(3) | F(4)/F(1) |
| 57               | 4.935          | -1.000                         | -0.227    | +0.220    | -0.276    |
| 60               | 4.902          | -1.000                         | -0.231    | +0.217    | -0.268    |
| 62               | 4.87           | -1.000                         | -0.244    | +0.222    | -0.259    |
| 65               | 4.839          | -1.000                         | -0.243    | +0.223    | -0.255    |
| 67               | 4.815          | -1.000                         | -0.234    | +0.223    | -0.262    |
| 70               | 4.785          | -1.000                         | -0.240    | +0.221    | -0.261    |
| 72               | 4.765          | -1.000                         | -0.237    | +0.221    | -0.254    |
| 75               | 4.736          | -1.000                         | -0.232    | +0.211    | -0.230    |
| 80               | 4.69           | -1.000                         | -0.240    | +0.211    | -0.248    |

**Table S2:** Structural parameters of DMPC, egg-PC and DOPC (30 °C) and DMPE (60 °C). Parameters are compared to literature values given in brackets.

| Parameter                                                    | DMPC (30 °C)                   | DOPC (30 °C)                   | Egg-PC (30 °C)                 | DMPE (60 °C)                   |
|--------------------------------------------------------------|--------------------------------|--------------------------------|--------------------------------|--------------------------------|
| <b>d-spacing (nm)</b>                                        | 6.27<br>(6.27 <sup>2</sup> )   | 6.27<br>(6.31 <sup>2</sup> )   | 6.35<br>(6.63 <sup>2</sup> )   | 4.90<br>(4.83 <sup>3</sup> )   |
| <b>d<sub>HH</sub> (nm)</b><br>(head to head)                 | 3.44<br>(3.60 <sup>2</sup> )   | 3.63<br>(3.69 <sup>2</sup> )   | 3.66<br>(3.69 <sup>2</sup> )   | 3.61<br>(3.39 <sup>3</sup> )   |
| <b>d<sub>LZ</sub> (nm)</b><br>(bilayer thickness by Luzzati) | 3.49<br>(3.69 <sup>2</sup> )   | 3.53<br>(3.59 <sup>2</sup> )   | 3.56<br>(3.63 <sup>2</sup> )   | 3.49<br>(3.41 <sup>3</sup> )   |
| <b>A<sub>L</sub> (nm<sup>2</sup>)</b>                        | 0.619<br>(0.596 <sup>2</sup> ) | 0.723<br>(0.725 <sup>2</sup> ) | 0.694<br>(0.694 <sup>2</sup> ) | 0.582<br>(0.596 <sup>3</sup> ) |
| <b>n<sub>w</sub> total</b><br>(per lipid)                    | 24.1<br>(25.6 <sup>2</sup> )   | 33.0<br>(32.8 <sup>2</sup> )   | 31.8<br>(34.7 <sup>2</sup> )   | 12.2<br>(11 <sup>4</sup> )     |

## Derivation of the parameter $D_{H2}$

$D_{H2}$  can be derived from setting the **water volume in the headgroup regions** equal, using the excluded headgroup volume expression and Luzzati ansatz<sup>5</sup>, respectively:

$$A_L = \frac{2V_L}{d_{Lz}} = \frac{2V_L}{d_{HH}+2(D_{H2}-D_{H1})} \quad (1)$$

$$D_H A_L - V_H = A_L(D_H - D_{H2}) \quad (2)$$

Inserting (1) in (2):

$$\Leftrightarrow \frac{2D_H V_L}{d_{HH}+2(D_{H2}-D_{H1})} - V_H = \frac{2V_L(D_H - D_{H2})}{d_{HH}+2(D_{H2}-D_{H1})}$$

$$\Leftrightarrow V = \frac{D_{H2} 2V_L}{d_{HH}+2(D_{H2}-D_{H1})}$$

$$\Leftrightarrow V_H d_{HH} + 2V_H D_{H2} - 2V_H D_{H1} = 2D_{H2} V_L$$

$$\Leftrightarrow V_H(d_{HH} - 2D_{H1}) = 2D_{H2}(V_L - V_H)$$

$$\Leftrightarrow D_{H2} = \frac{V_H(d_{HH} - 2D_{H1})}{2(V_L - V_H)}$$

Alternatively, one may set the **area per lipid expressions** equal that derive from McIntosh<sup>6</sup> and Luzzati<sup>5</sup> ideas, respectively:

$$A_L = \frac{2(V_L - V_H)}{d_{HH} - 2D_{H1}} = \frac{2V_L}{d_{HH} + 2(D_{H2} - D_{H1})}$$

$$\Leftrightarrow 2V_L d_{HH} + 4V_L D_{H2} - 4V_L D_{H1} - 2V_H d_{HH} - 4V_H D_{H2} + 4V_H D_{H1} = 2V_L d_{HH} - 4V_L D_{H1}$$

$$\Leftrightarrow 4V_L D_{H2} - 4V_H D_{H2} = 2V_H d_{HH} - 4V_H D_{H1}$$

$$\Leftrightarrow 2D_{H2}(V_L - V_H) = V_H(d_{HH} - 2D_{H1})$$

$$\Leftrightarrow D_{H2} = \frac{V_H(d_{HH} - 2D_{H1})}{2(V_L - V_H)}$$

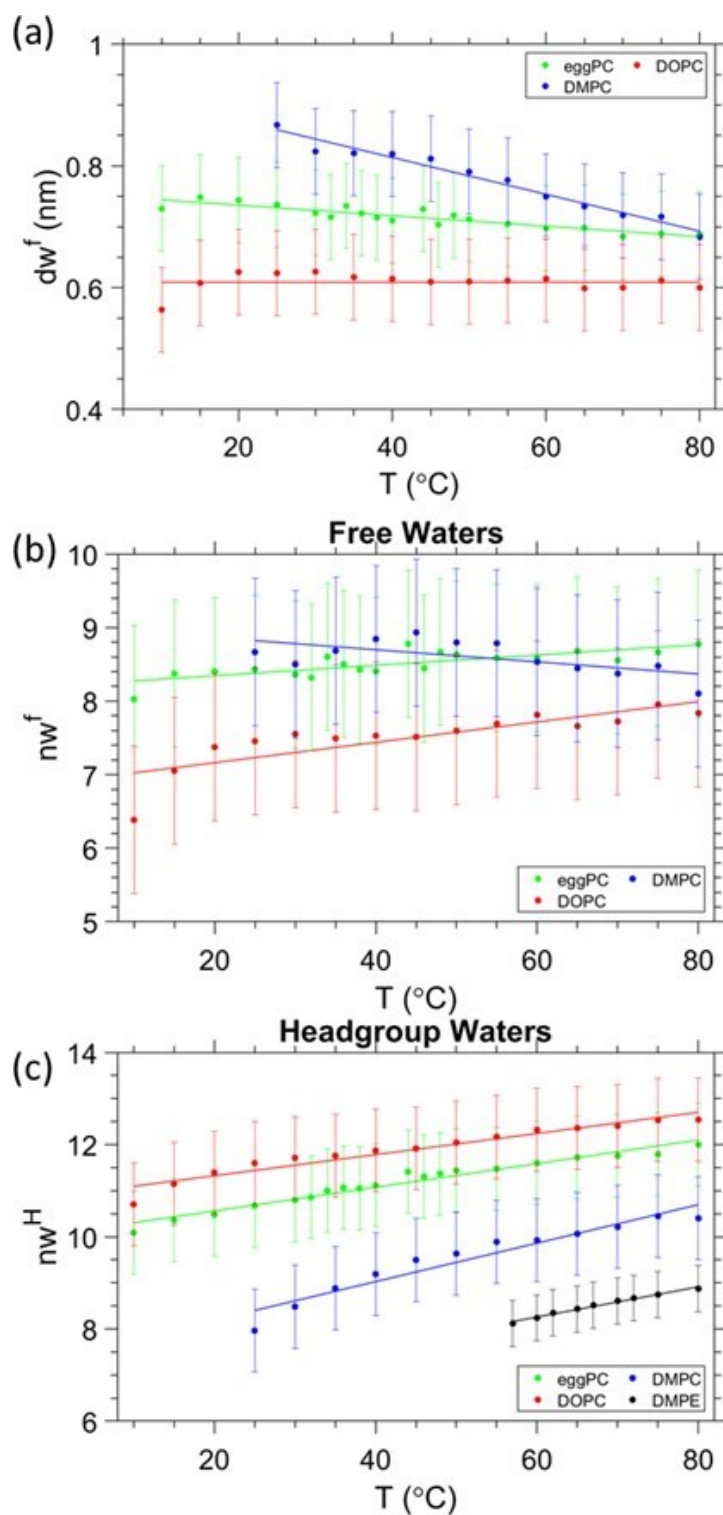

**Fig. S3** Refined membrane hydration. a) The refined free water layer thickness for the PCs is presented, using the linear regression of  $D_H(T)$  obtained from DOPC and DMPE data, respectively. b) Refined number of waters in the headgroup region, and c) the refined number of water molecules in the free water layer are shown. Note, the perturbed water layer remains unchanged, when applying  $D_H(T)$  instead of  $D_H = \text{constant}$ .

## References

1. M. Rappolt, *J. Appl. Phys.*, 2010, **107**.
2. J. F. Nagle and S. Tristram-Nagle, *Biochimica Et Biophysica Acta-Reviews on Biomembranes*, 2000, **1469**, 159-195.
3. M. Rappolt, P. Laggner and G. Pabst, in *Recent Research Developments in Biophysics*, ed. S. G. Pandalai, Transworld Research Network, Trivandrum, 2004, vol. 3, Part II, ch. 20, pp. 365-394.
4. D. A. Wilkinson and J. F. Nagle, *Biochemistry*, 1981, **20**, 187-192.
5. V. Luzzati and F. Husson, *J. Cell Biol.*, 1962, **12**, 207-219.
6. T. J. McIntosh and S. A. Simon, *Biochemistry*, 1986, **25**, 4948-4952.
